# Supplementary material for: Development of Nanoemulsions for Topical Application of Mupirocin
Source: MDPI journal article supplement (doi:10.3390/pharmaceutics15020378), 2023-01-22
Supplement: s1 [file s1]

## Supplementary materials

Table S1 The obtained response (actual and predicted) for nanoemulsion formulations of CCD trials.

| Run | Independent variables        |                               |                  | Dependant variables |           |                  |           |
|-----|------------------------------|-------------------------------|------------------|---------------------|-----------|------------------|-----------|
|     | X <sub>1</sub> :             | X <sub>2</sub> :              | X <sub>3</sub> : | Y <sub>1</sub> :    |           | Y <sub>2</sub> : |           |
|     | Homogenisation<br>time (min) | Ultrasonication<br>time (min) | Amplitude<br>(%) | Size (nm)           |           | PDI              |           |
|     |                              |                               |                  | Actual              | Predicted | Actual           | Predicted |
| 1   | 7.5                          | 15                            | 60               | 86.23               | 85.75     | 0.137            | 0.136     |
| 2   | 5                            | 10                            | 50               | 91.69               | 88.39     | 0.150            | 0.148     |
| 3   | 10                           | 10                            | 50               | 87.75               | 88.39     | 0.141            | 0.142     |
| 4   | 5                            | 20                            | 50               | 88.41               | 85.10     | 0.127            | 0.127     |
| 5   | 10                           | 20                            | 50               | 83.81               | 85.10     | 0.137            | 0.130     |
| 6   | 5                            | 10                            | 70               | 88.95               | 86.40     | 0.134            | 0.139     |
| 7   | 10                           | 10                            | 70               | 84.47               | 86.40     | 0.139            | 0.137     |
| 8   | 5                            | 20                            | 70               | 84.62               | 83.11     | 0.132            | 0.129     |
| 9   | 7.5                          | 15                            | 60               | 84.27               | 85.75     | 0.126            | 0.136     |
| 10  | 10                           | 20                            | 70               | 84.47               | 83.11     | 0.137            | 0.137     |
| 11  | 5                            | 15                            | 60               | 85.16               | 85.75     | 0.136            | 0.136     |
| 12  | 10                           | 15                            | 60               | 82.60               | 85.75     | 0.129            | 0.136     |
| 13  | 7.5                          | 10                            | 60               | 88.20               | 87.39     | 0.152            | 0.141     |
| 14  | 7.5                          | 20                            | 60               | 83.30               | 84.10     | 0.132            | 0.131     |
| 15  | 7.5                          | 15                            | 50               | 85.10               | 86.74     | 0.132            | 0.137     |
| 16  | 7.5                          | 15                            | 70               | 84.30               | 84.75     | 0.137            | 0.135     |
| 17  | 7.5                          | 15                            | 60               | 84.42               | 85.75     | 0.134            | 0.136     |

Table S2 ANOVA data for droplet size of nanoemulsions.

| Source                                      | DF | Adjusted Sum of Square | Adjusted Mean Square | <i>F</i> -Value | <i>p</i> -Value |
|---------------------------------------------|----|------------------------|----------------------|-----------------|-----------------|
| Model                                       | 9  | 83.7997                | 9.3111               | 6.43            | 0.011           |
| Linear                                      | 3  | 61.7212                | 20.5737              | 14.22           | 0.002           |
| X <sub>1</sub> : Homogenisation time (min)  | 1  | 24.7506                | 24.7506              | 17.1            | 0.004           |
| X <sub>2</sub> : Ultrasonication time (min) | 1  | 27.0789                | 27.0789              | 18.71           | 0.003           |
| X <sub>3</sub> : Amplitude (%)              | 1  | 9.8916                 | 9.8916               | 6.84            | 0.035           |
| Square                                      | 3  | 17.4404                | 5.8135               | 4.02            | 0.059           |
| X <sub>1</sub> <sup>2</sup>                 | 1  | 0.0607                 | 0.0607               | 0.04            | 0.844           |
| X <sub>2</sub> <sup>2</sup>                 | 1  | 7.9066                 | 7.9066               | 5.46            | 0.052           |
| X <sub>3</sub> <sup>2</sup>                 | 1  | 1.201                  | 1.201                | 0.83            | 0.393           |
| 2-Way Interaction                           | 3  | 4.6382                 | 1.5461               | 1.07            | 0.422           |
| X <sub>1</sub> X <sub>2</sub>               | 1  | 1.6845                 | 1.6845               | 1.16            | 0.316           |
| X <sub>1</sub> X <sub>3</sub>               | 1  | 1.9185                 | 1.9185               | 1.33            | 0.287           |
| X <sub>2</sub> X <sub>3</sub>               | 1  | 1.0351                 | 1.0351               | 0.72            | 0.426           |
| Error                                       | 7  | 10.1298                | 1.4471               |                 |                 |
| Lack-of-Fit                                 | 5  | 7.7544                 | 1.5509               | 1.31            | 0.487           |
| Pure Error                                  | 2  | 2.3754                 | 1.1877               |                 |                 |
| Total                                       | 16 | 93.9295                |                      |                 |                 |

Table S3 ANOVA data for PDI of nanoemulsions.

| Source                                      | DF | Adjusted<br>Sum of<br>Square | Adjusted<br>Mean<br>Square | <i>F</i> -Value | <i>p</i> -Value |
|---------------------------------------------|----|------------------------------|----------------------------|-----------------|-----------------|
| Model                                       | 6  | 0.000396                     | 0.000066                   | 1.75            | 0.208           |
| Linear                                      | 3  | 0.000269                     | 0.00009                    | 2.37            | 0.132           |
| X <sub>1</sub> : Homogenisation time (min)  | 1  | 0.000001                     | 0.000001                   | 0.01            | 0.907           |
| X <sub>2</sub> : Ultrasonication time (min) | 1  | 0.000264                     | 0.000264                   | 6.98            | 0.025           |
| X <sub>3</sub> : Amplitude (%)              | 1  | 0.000005                     | 0.000005                   | 0.13            | 0.726           |
| 2-Way Interaction                           | 3  | 0.000127                     | 0.000042                   | 1.12            | 0.387           |
| X <sub>1</sub> X <sub>2</sub>               | 1  | 0.000045                     | 0.000045                   | 1.19            | 0.3             |
| X <sub>1</sub> X <sub>3</sub>               | 1  | 0.000012                     | 0.000012                   | 0.31            | 0.59            |
| X <sub>2</sub> X <sub>3</sub>               | 1  | 0.00007                      | 0.00007                    | 1.85            | 0.203           |
| Error                                       | 10 | 0.000378                     | 0.000038                   |                 |                 |
| Lack-of-Fit                                 | 8  | 0.000314                     | 0.000039                   | 1.23            | 0.522           |
| Pure Error                                  | 2  | 0.000064                     | 0.000032                   |                 |                 |
| Total                                       | 16 | 0.000774                     |                            |                 |                 |
